# Supplementary material for: pH/redox dual stimuli-responsive sheddable nanodaisies for efficient intracellular tumour-triggered drug delivery
Source: Royal Society of Chemistry journal article supplement (doi:10.1039/c7tb00030h), 2017-01-01
Supplement: c7tb00030h1.pdf [file c7tb00030h1.pdf]

## Supporting Information

### pH/Redox Dual Stimuli-Responsive Sheddable Nanodaisies for Efficient Intracellular Tumour-Triggered Doxorubicin Delivery

Johnson V. John<sup>#</sup>, Saji Uthaman,<sup>#</sup> Rimesh Augustine, Hongyu Chen, In-Kyu Park,<sup>\*</sup> and Il Kim,<sup>\*</sup>

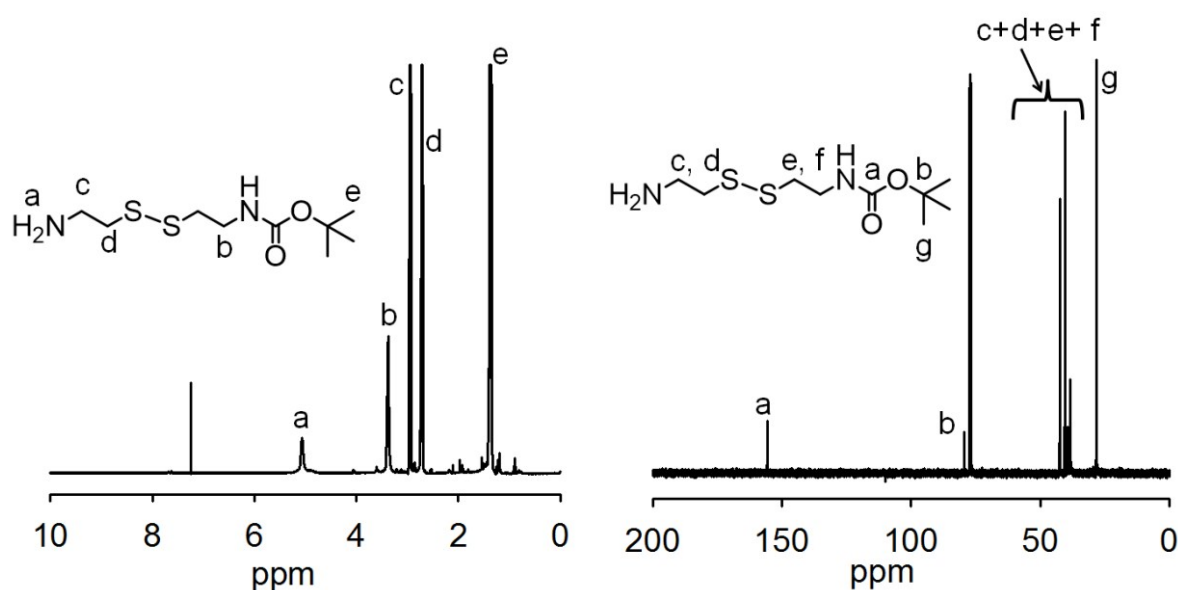

**Figure S1.** (i)  $^1\text{H}$  and (ii)  $^{13}\text{C}$  NMR spectra of mono-Boc-cystamine,  $\text{CDCl}_3$  as a solvent.

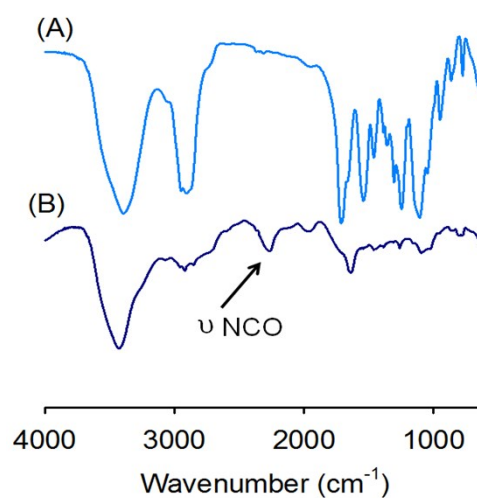

**Figure S2.** FT-IR spectra of (A) mono-Boc-cystamine-PU-mono-Boc-cystamine, and (B) NCO-PU-NCO.

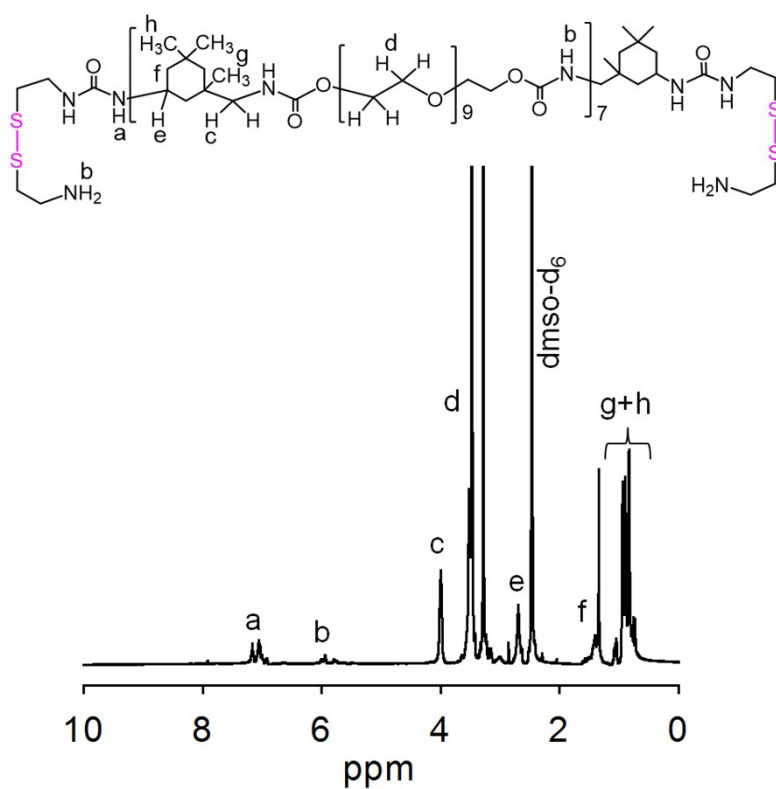

**Figure S3.**  $^1\text{H}$  NMR spectra of  $\text{NH}_2\text{-SS-Polyurethane-SS-NH}_2$  polyurethanes in  $\text{DMSO-d}_6$ .

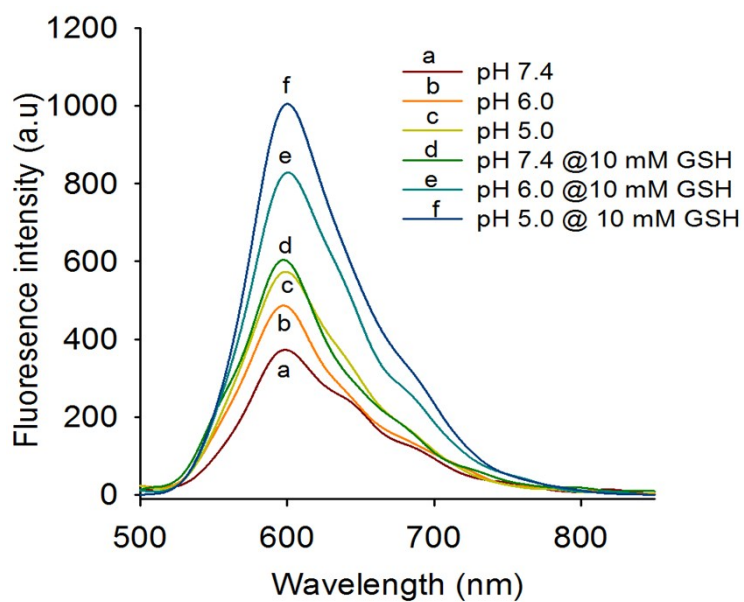

**Figure S4.** Dual stimuli-responsive fluorescence spectra of  $\text{p(L-histidine)}_{75}\text{-SS-polyurethane-SS-p(L-histidine)}_{75}$  [ $\text{p(His)}_{75}\text{-SS-PU-SS-p(His)}_{75}$ ] driven Dox loaded NDs.

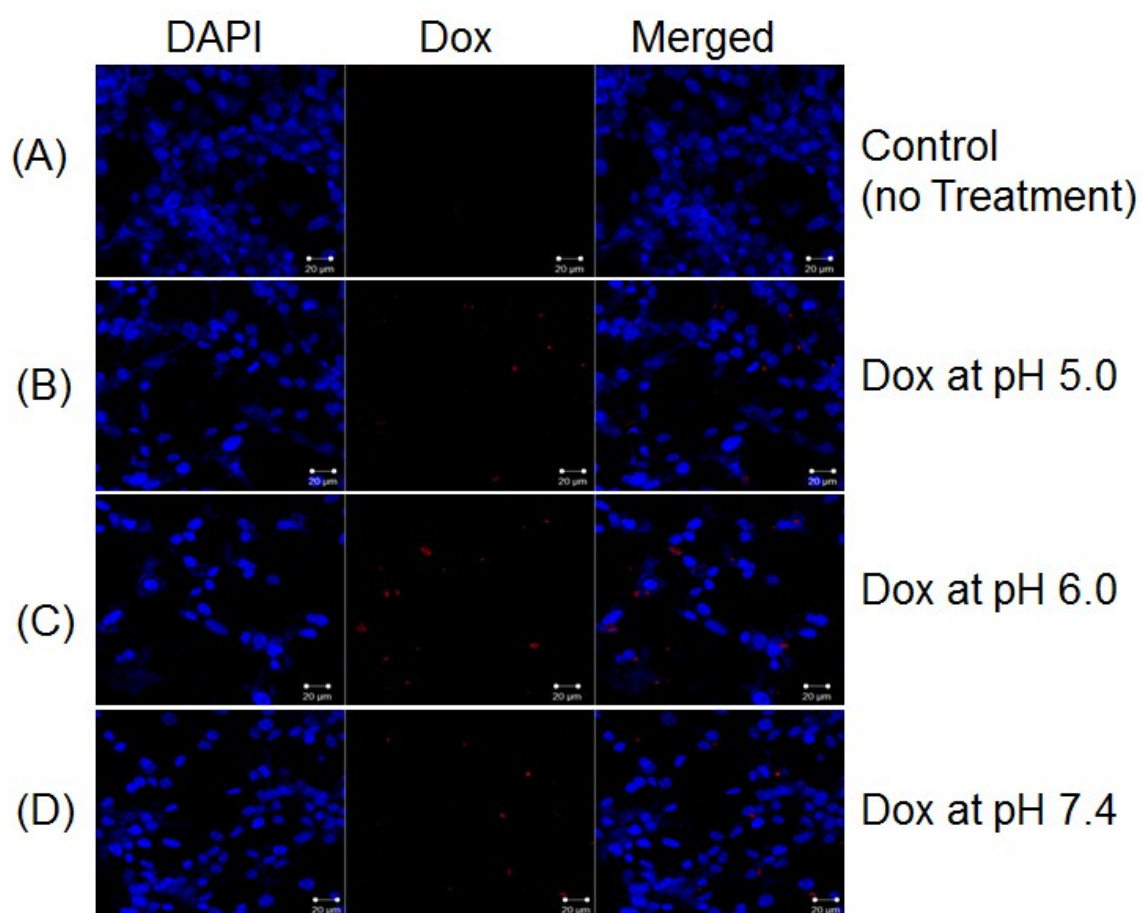

**Figure S5.** Confocal laser scanning microscopy (CLSM) images of CT26 cells incubated with Free Dox. (A) Free Dox (B) at pH 7.4 (C) pH 6.0 and (D) pH 4.0. All samples were incubated for 4 h, after which images were captured. A final Dox concentration of 2.5  $\mu\text{g/mL}$  was used for all experiments [DAPI, 4',6-diamidino-2-phenylindole].

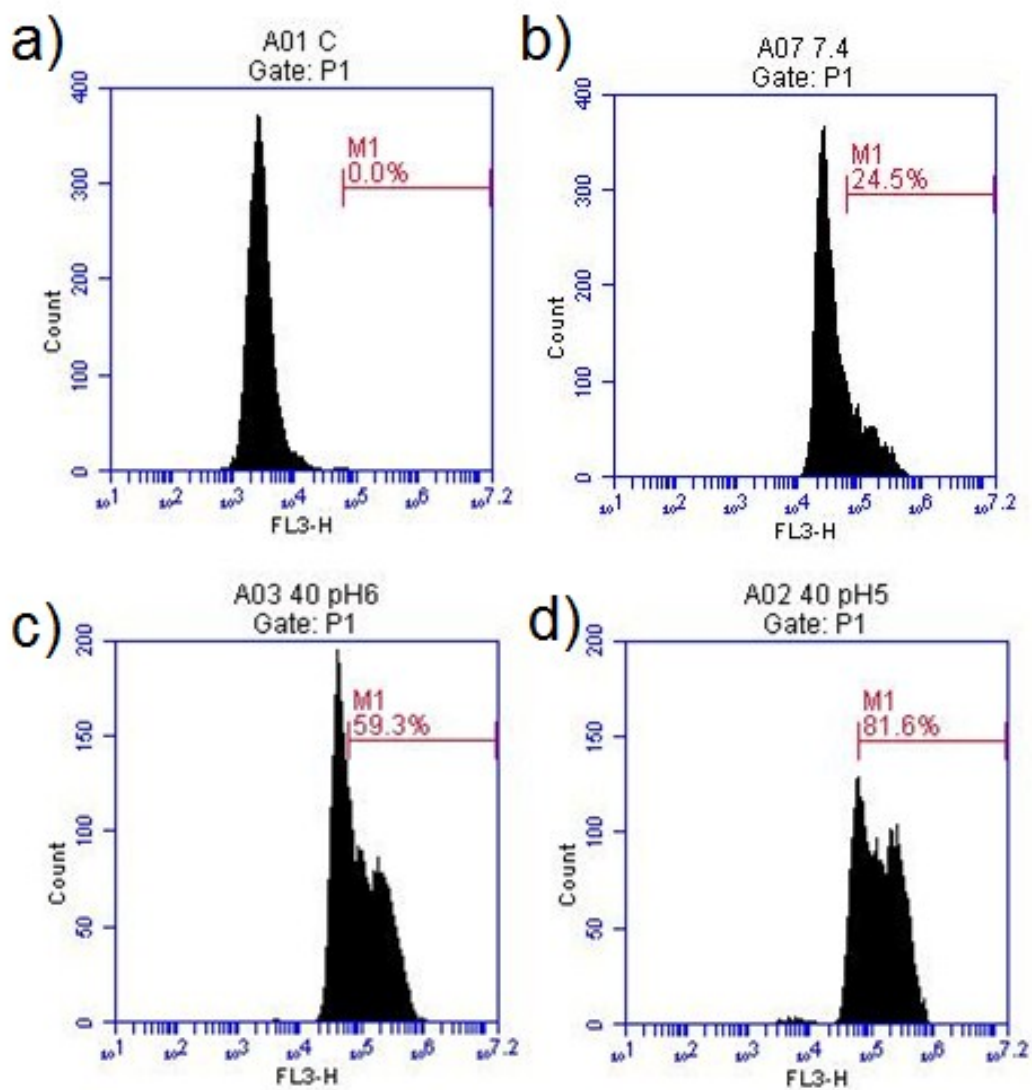

**Figure S6.** Flow cytometric analysis of CT26 cells after exposure for 2 h to (a) free Dox as control and Dox-loaded p(L-histidine)<sub>n</sub>-SS-polyurethane-SS-p(L-histidine)<sub>75</sub> [p(His)<sub>75</sub>-SS-PU-SS-p(His)<sub>75</sub>] nanodaisies (10  $\mu$ g/mL) incubate at pH 7.4 (b) , pH 6.0 (c), and pH 5.0 (d).

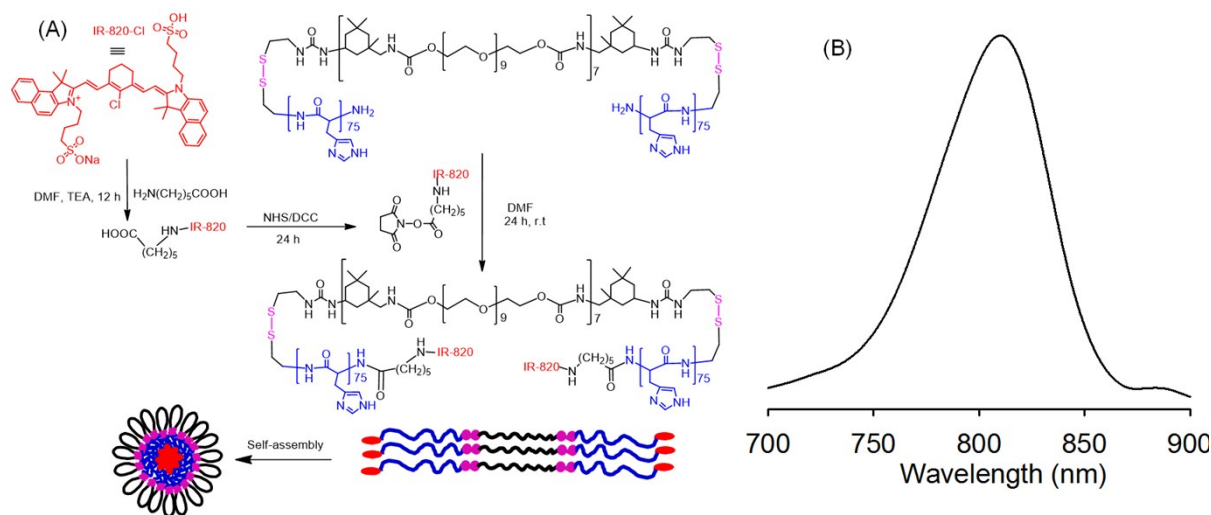

**Figure S7.** (A) Synthesis pathway of the IR-820 conjugated p(L-histidine)<sub>n</sub>-SS-polyurethane-SS-p(L-histidine)<sub>75</sub> [p(His)<sub>75</sub>-SS-PU-SS-p(His)<sub>75</sub>] triblock copolymers and schematic representation of IR-820 formulated micelles and (B) fluorescence spectra of the IR-820 labeled nanodaisies.

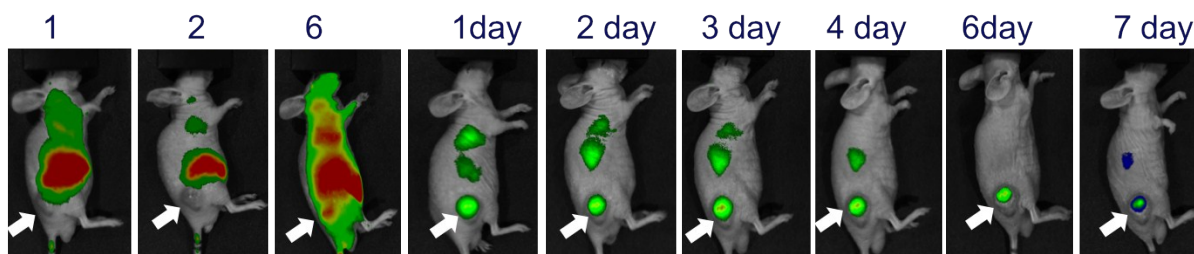

**Figure S8.** *In vivo* biodistribution of infrared (IR)-820-conjugated p(L-histidine)<sub>75</sub>-SS-polyurethane-SS-p(L-histidine)<sub>75</sub> [p(His)<sub>75</sub>-SS-PU-SS-p(His)<sub>75</sub>] nanodaisies in CT26 tumour-bearing Balb/C nude mice.

**Table S1.** Compositions and physical properties of mono-Boc-cystamine end-capped polyurethane.

| Sample                                       | Feed ratio                                    | $M_n$             |                | $^aD$ |
|----------------------------------------------|-----------------------------------------------|-------------------|----------------|-------|
|                                              | PEG/IPDI/ mono-Boc-cystamine<br>(mol/mol/mol) | Theor.<br>(g/mol) | GPC<br>(g/mol) |       |
| mono-Boc-cystamine-<br>PU-mono-Boc-cystamine | 0.95/1/1                                      | 6000              | 9500           | 1.42  |

<sup>a</sup>Polydispersity index measured by GPC.
